# Supplementary material
Source: PubMed Central journal article supplement (PMC4966163)
Supplement: NIHMS799290-supplement-Table_1.pdf [file NIHMS799290-supplement-Table_1.pdf]

**Supplementary table 1.** Overview of clinical, histological, and genetic data for each patient (n=30).

| #  | Pathology number | Date of enucleation | Age at enucleation (years) | Follow-up (months) | Status               | SNP chr 3 | SNP chr 8q | SNP chr 6p | <i>BAP1</i> gene expr. ILMN_1768363 (log2 value) | <i>BAP1</i> gene-expr. compared to median | BAP1 immunostaining | 15-gene expression class | Prominence (mm) | Largest basal diameter (mm) | Ciliary body involvement | FISH isolated nuclei monosomy chr 3 (%) | Stage group | Gender | Histological cell type |
|----|------------------|---------------------|----------------------------|--------------------|----------------------|-----------|------------|------------|--------------------------------------------------|-------------------------------------------|---------------------|--------------------------|-----------------|-----------------------------|--------------------------|-----------------------------------------|-------------|--------|------------------------|
| 1  | 99-184           | 1999-09-21          | 84                         | 14                 | Death due to meta    | Monosomy  | Gain       | Disomy     | 7.578668                                         | Higher                                    | Negative            | Class 2                  | 8               | 17                          | Yes                      | 57                                      | IIIA        | Female | Mixed                  |
| 2  | 99-187           | 1999-09-22          | 46                         | 156                | Alive                | Disomy    | Disomy     | Disomy     | 7.543326                                         | Higher                                    | Positive            | Class 1                  | 9               | 12                          | No                       | 1                                       | IIA         | Male   | Spindle                |
| 3  | 99-239           | 1999-11-04          | 73                         | 47                 | Death due to meta    | Monosomy  | Gain       | Disomy     | 7.035375                                         | Lower                                     | Negative            | Class 2                  | 9               | 16                          | Yes                      | 41                                      | IIIA        | Female | Mixed                  |
| 4  | 20-005           | 2000-01-25          | 28                         | 96                 | Death due to meta    | Monosomy  | Gain       | Disomy     | 7.372292                                         | Lower                                     | -                   | Class 2                  | 3               | 8                           | No                       | 27                                      | I           | Male   | Spindle                |
| 5  | 20-042           | 2000-05-08          | 48                         | 14                 | Death due to meta    | Monosomy  | Gain       | Gain       | 6.304498                                         | Lower                                     | Negative            | Class 2                  | 6               | 18                          | Yes                      | 78                                      | IIB         | Male   | Mixed                  |
| 6  | 20-125           | 2000-09-27          | 58                         | 147                | Alive                | Disomy    | Gain       | Gain       | 8.088149                                         | Higher                                    | Positive            | Class 1                  | 7               | 9                           | No                       | 1                                       | IIA         | Male   | Spindle                |
| 7  | 20-128           | 2000-10-11          | 71                         | 28                 | Death due to meta    | Monosomy  | Gain       | Disomy     | 6.103587                                         | Lower                                     | Negative            | Class 2                  | 8               | 15                          | No                       | 57                                      | IIB         | Male   | Epithelioid            |
| 8  | 20-173           | 2000-11-28          | 68                         | 36                 | Death due to meta    | Monosomy  | Gain       | Disomy     | 7.013902                                         | Lower                                     | Negative            | Class 2                  | 6               | 15                          | Yes                      | 82                                      | IIIA        | Female | Mixed                  |
| 9  | 20-178           | 2000-12-14          | 72                         | 30                 | Death due to meta    | Monosomy  | Gain       | Disomy     | 6.867930                                         | Lower                                     | Positive            | Class 2                  | 4               | 16                          | Yes                      | 40                                      | IIIA        | Female | Mixed                  |
| 10 | 01-042           | 2001-02-21          | 68                         | 141                | Alive                | Disomy    | Disomy     | Disomy     | 7.491976                                         | Higher                                    | Positive            | Class 1                  | 7               | 11                          | Yes                      | 1                                       | IIB         | Male   | Spindle                |
| 11 | 01-074           | 2001-03-28          | 72                         | 66                 | Death due to unknown | Disomy    | Gain       | Gain       | 7.507821                                         | Higher                                    | Positive            | Class 1                  | 1.5             | 16                          | No                       | 29                                      | IIB         | Male   | Spindle                |
| 12 | 01-091           | 2001-04-18          | 73                         | 16                 | Death due to meta    | Monosomy  | Gain       | Disomy     | 7.140922                                         | Lower                                     | Negative            | Class 2                  | 9               | 12                          | Yes                      | 63                                      | IIB         | Male   | Mixed                  |
| 13 | 01-129           | 2001-06-13          | 73                         | 63                 | Death due to unknown | Disomy    | Disomy     | Disomy     | 6.523498                                         | Lower                                     | Negative            | Class 2                  | 5               | 11                          | No                       | 17                                      | IIA         | Male   | Epithelioid            |
| 14 | 01-131           | 2001-06-28          | 44                         | 24                 | Death due to meta    | Monosomy  | Gain       | Disomy     | 6.948449                                         | Lower                                     | Negative            | Class 2                  | 12              | 16                          | Yes                      | 82                                      | IIIA        | Female | Mixed                  |
| 15 | 02-158           | 2002-09-11          | 33                         | 120                | Alive                | Disomy    | Disomy     | Gain       | 8.133905                                         | Higher                                    | Positive            | Class 1                  | 10              | 15                          | No                       | 1                                       | IIB         | Female | Mixed                  |
| 16 | 02-167           | 2002-09-25          | 50                         | 126                | Death due to unknown | Monosomy  | Disomy     | Disomy     | 7.235247                                         | Lower                                     | -                   | Class 1                  | 2               | 10                          | No                       | 3                                       | I           | Female | Epithelioid            |
| 17 | 02-174           | 2002-09-30          | 76                         | 53                 | Death due to meta    | Monosomy  | Gain       | Disomy     | 7.053599                                         | Lower                                     | Negative            | Class 2                  | 8               | 16                          | No                       | 40                                      | IIB         | Female | Spindle                |
| 18 | 02-189           | 2002-10-16          | 64                         | 35                 | Death due to meta    | Monosomy  | Gain       | Disomy     | -                                                | -                                         | Negative            | Class 1                  | 9               | 13                          | Yes                      | 64                                      | IIIA        | Male   | Spindle                |
| 19 | 02-199           | 2002-12-11          | 72                         | 121                | Alive                | Disomy    | Disomy     | Disomy     | 7.763919                                         | Higher                                    | Positive            | Class 1                  | 5               | 9                           | No                       | 58                                      | I           | Male   | Mixed                  |

|    |        |            |    |     |                   |          |        |        |          |        |          |         |    |    |     |    |      |        |             |
|----|--------|------------|----|-----|-------------------|----------|--------|--------|----------|--------|----------|---------|----|----|-----|----|------|--------|-------------|
| 20 | 03-031 | 2003-07-10 | 63 | 113 | Alive             | Monosomy | Gain   | Disomy | -        | -      | Negative | Class 2 | 5  | 13 | No  | 60 | IIA  | Male   | Epithelioid |
| 21 | 03-086 | 2003-07-31 | 81 | 111 | Alive             | Disomy   | Disomy | Disomy | 7.559229 | Higher | Positive | Class 1 | 11 | 13 | No  | 0  | IIB  | Male   | Mixed       |
| 22 | 03-087 | 2003-08-04 | 65 | 112 | Alive             | Disomy   | Disomy | Gain   | 7.398445 | Higher | Positive | Class 1 | 6  | 9  | No  | 1  | I    | Male   | Spindle     |
| 23 | 03-120 | 2003-11-06 | 56 | 114 | Alive             | Disomy   | Disomy | Gain   | 7.689024 | Higher | Negative | Class 1 | 7  | 13 | Yes | 60 | IIIA | Female | Mixed       |
| 24 | 03-129 | 2003-12-10 | 54 | 112 | Alive             | Monosomy | Gain   | Disomy | 7.754260 | Higher | Positive | Class 2 | 12 | 13 | No  | 7  | IIB  | Female | Epithelioid |
| 25 | 04-018 | 2004-02-24 | 74 | 113 | Alive             | Disomy   | Gain   | Gain   | 6.321865 | Lower  | Negative | Class 2 | 6  | 13 | No  | 4  | IIA  | Female | Spindle     |
| 26 | 04-035 | 2004-04-16 | 54 | 61  | Death due to meta | Monosomy | Gain   | Disomy | 7.390188 | Lower  | Positive | Class 2 | 6  | 14 | No  | 52 | IIIA | Female | Mixed       |
| 27 | 04-074 | 2004-06-23 | 71 | 36  | Death due to meta | Disomy   | Disomy | Gain   | 7.492790 | Higher | Positive | Class 1 | 7  | 17 | Yes | 2  | IIIB | Male   | Mixed       |
| 28 | 04-075 | 2004-06-30 | 34 | 101 | Alive             | Disomy   | Gain   | Gain   | 7.612630 | Higher | Positive | Class 1 | 9  | 18 | Yes | 3  | IIIB | Female | Spindle     |
| 29 | 04-103 | 2004-09-01 | 52 | 97  | Alive             | Disomy   | Disomy | Gain   | 7.753649 | Higher | Positive | Class 1 | 10 | 15 | No  | 1  | IIB  | Male   | Spindle     |
| 30 | 04-112 | 2004-12-02 | 75 | 22  | Death due to meta | Monosomy | Gain   | Disomy | 6.681977 | Lower  | Negative | Class 2 | 12 | 18 | Yes | 94 | IIIA | Male   | Mixed       |
