# Supplementary material
Source: PubMed Central journal article supplement (PMC4966163)
Supplement: NIHMS799290-supplement-Table_2.pdf [file NIHMS799290-supplement-Table_2.pdf]

**Supplementary table 2.** Comparison of different prognostic parameters with survival in 30 uveal melanoma patients. An Univariate Cox regression analysis was performed here, with the unknown deaths not censored, but attributed to death to metastasis.

| <i>Parameters</i>                                     |                 | <i>Univariate analysis- unknown cases attributed to death due to metastasis</i> |              |              |                |
|-------------------------------------------------------|-----------------|---------------------------------------------------------------------------------|--------------|--------------|----------------|
|                                                       |                 | 95% confidence interval                                                         |              |              |                |
| <b>Standard clinical/histological parameters</b>      | <b><i>n</i></b> | <b>HR</b>                                                                       | <b>Lower</b> | <b>Upper</b> | <b>p-value</b> |
| Gender                                                |                 |                                                                                 |              |              |                |
| Male                                                  | 17              | -                                                                               | -            | -            | -              |
| Female                                                | 13              | 1.2                                                                             | 0.5          | 3.3          | 0.65           |
| Ciliary Body involvement                              |                 |                                                                                 |              |              |                |
| No                                                    | 17              | -                                                                               | -            | -            | -              |
| Yes                                                   | 13              | 3.8                                                                             | 1.4          | 10.4         | 0.008          |
| Stage group                                           |                 |                                                                                 |              |              |                |
| Stage I & IIA                                         | 9               | -                                                                               | -            | -            | -              |
| Stage IIB                                             | 10              | 2.4                                                                             | 0.6          | 10.2         | 0.24           |
| Stage IIIA                                            | 9               | 8.1                                                                             | 1.9          | 33.7         | 0.004          |
| Stage IIIB                                            | 2               | 2.5                                                                             | 0.3          | 25.1         | 0.43           |
| Age at enucleation (years; low to high; continuous)   | 30              | 1.0                                                                             | 1.0          | 1.1          | 0.14           |
| Largest basal diameter (mm; low to high; continuous)  | 30              | 1.3                                                                             | 1.1          | 1.6          | 0.008          |
| <b>Chromosomal aberrations</b>                        |                 |                                                                                 |              |              |                |
| FISH on isolated nuclei, cut-off at 5%                |                 |                                                                                 |              |              |                |
| Disomy chromosome 3                                   | 11              | -                                                                               | -            | -            | -              |
| Monosomy chromosome 3                                 | 19              | 15.1                                                                            | 2.0          | 115.1        | 0.009          |
| FISH on isolated nuclei, cut-off at 30%               |                 |                                                                                 |              |              |                |
| Disomy chromosome 3                                   | 15              | -                                                                               | -            | -            | -              |
| Monosomy chromosome 3                                 | 15              | 6.4                                                                             | 2.0          | 20.5         | 0.002          |
| SNP on tumour DNA                                     |                 |                                                                                 |              |              |                |
| Disomy chromosome 3                                   | 14              | -                                                                               | -            | -            | -              |
| Monosomy chromosome 3                                 | 16              | 8.3                                                                             | 2.4          | 29.5         | 0.001          |
| Disomy chromosome 8q                                  | 11              | -                                                                               | -            | -            | -              |
| Gain chromosome 8q                                    | 19              | 4.8                                                                             | 1.4          | 17.1         | 0.015          |
| Disomy chrom 3 + disomy chrom 8q                      | 10              | -                                                                               | -            | -            | -              |
| Monosomy chrom 3 + gain chrom 8q                      | 15              | 16.7                                                                            | 2.2          | 129.6        | 0.007          |
| <b>Gene expression</b>                                |                 |                                                                                 |              |              |                |
| 15-gene expression assay class                        |                 |                                                                                 |              |              |                |
| Class 1                                               | 14              | -                                                                               | -            | -            | -              |
| Class 2                                               | 14              | 6.7                                                                             | 1.9          | 23.9         | 0.003          |
| <i>BAP1</i> gene expression (dichotomized at median)  |                 |                                                                                 |              |              |                |
| High                                                  | 14              | -                                                                               | -            | -            | -              |
| Low                                                   | 14              | 8.0                                                                             | 2.2          | 28.8         | 0.001          |
| <i>BAP1</i> gene expression (high to low; continuous) | 28              | 4.4                                                                             | 1.8          | 10.8         | 0.001          |
| <b>Immunohistochemistry</b>                           |                 |                                                                                 |              |              |                |
| Positive <i>BAP1</i> immunostaining                   | 14              | -                                                                               | -            | -            | -              |
| Negative <i>BAP1</i> immunostaining                   | 14              | 5.0                                                                             | 1.6          | 15.9         | 0.007          |

*HR = hazard ratio.*
